# Supplementary material for: Tailoring Lewis/Brønsted acid properties of MOF nodes via hydrothermal and solvothermal synthesis: simple approach with exceptional catalytic implications
Source: Royal Society of Chemistry journal article supplement (doi:10.1039/d1sc02833b), 2021-01-01
Supplement: d1sc02833b1.pdf [file d1sc02833b1.pdf]

## Supporting Information

# Tailoring Lewis/Brønsted acid properties of MOF nodes via hydrothermal and solvothermal synthesis: simple approach with exceptional catalytic implications

Sergio Rojas-Buzo,<sup>a</sup> Benjamin Bohigues,<sup>a</sup> Christian W. Lopes,<sup>b</sup> Débora M. Meira,<sup>c,d</sup> Mercedes Boronat,<sup>a</sup> Manuel Moliner\*<sup>a</sup> and Avelino Corma\*<sup>a</sup>

<sup>a</sup>Instituto de Tecnología Química, Universitat Politècnica de València - Consejo Superior de Investigaciones Científicas, Av. de los Naranjos, s/n, 46022 Valencia, Spain

<sup>b</sup>Institute of Chemistry, Universidade Federal do Rio Grande do Sul – UFRGS, Av. Bento Gonçalves, 9500, 91501-970 Porto Alegre, RS, Brazil.

<sup>c</sup>CLS@APS, Advanced Photon Source, Argonne National Laboratory, 9700 S. Cass Avenue, Argonne, IL 60439, USA.

<sup>d</sup>Canadian Light Source Inc., 44 Innovation Boulevard, Saskatoon, Saskatchewan S7N 2V3, Canada.

\*Corresponding authors: mmoliner@itq.upv.es, acorma@itq.upv.es

**Figure S1.** Hf-MOF-808 models used in the DFT simulations. The transferred proton in structures B and D, and the additional water molecules in E, F, G and H are marked with a blue circle. C and O atoms are depicted as gray and red sticks, Hf and H as cyan and white balls. The additional water molecules in G and H are not accessible for interaction with TMPO.

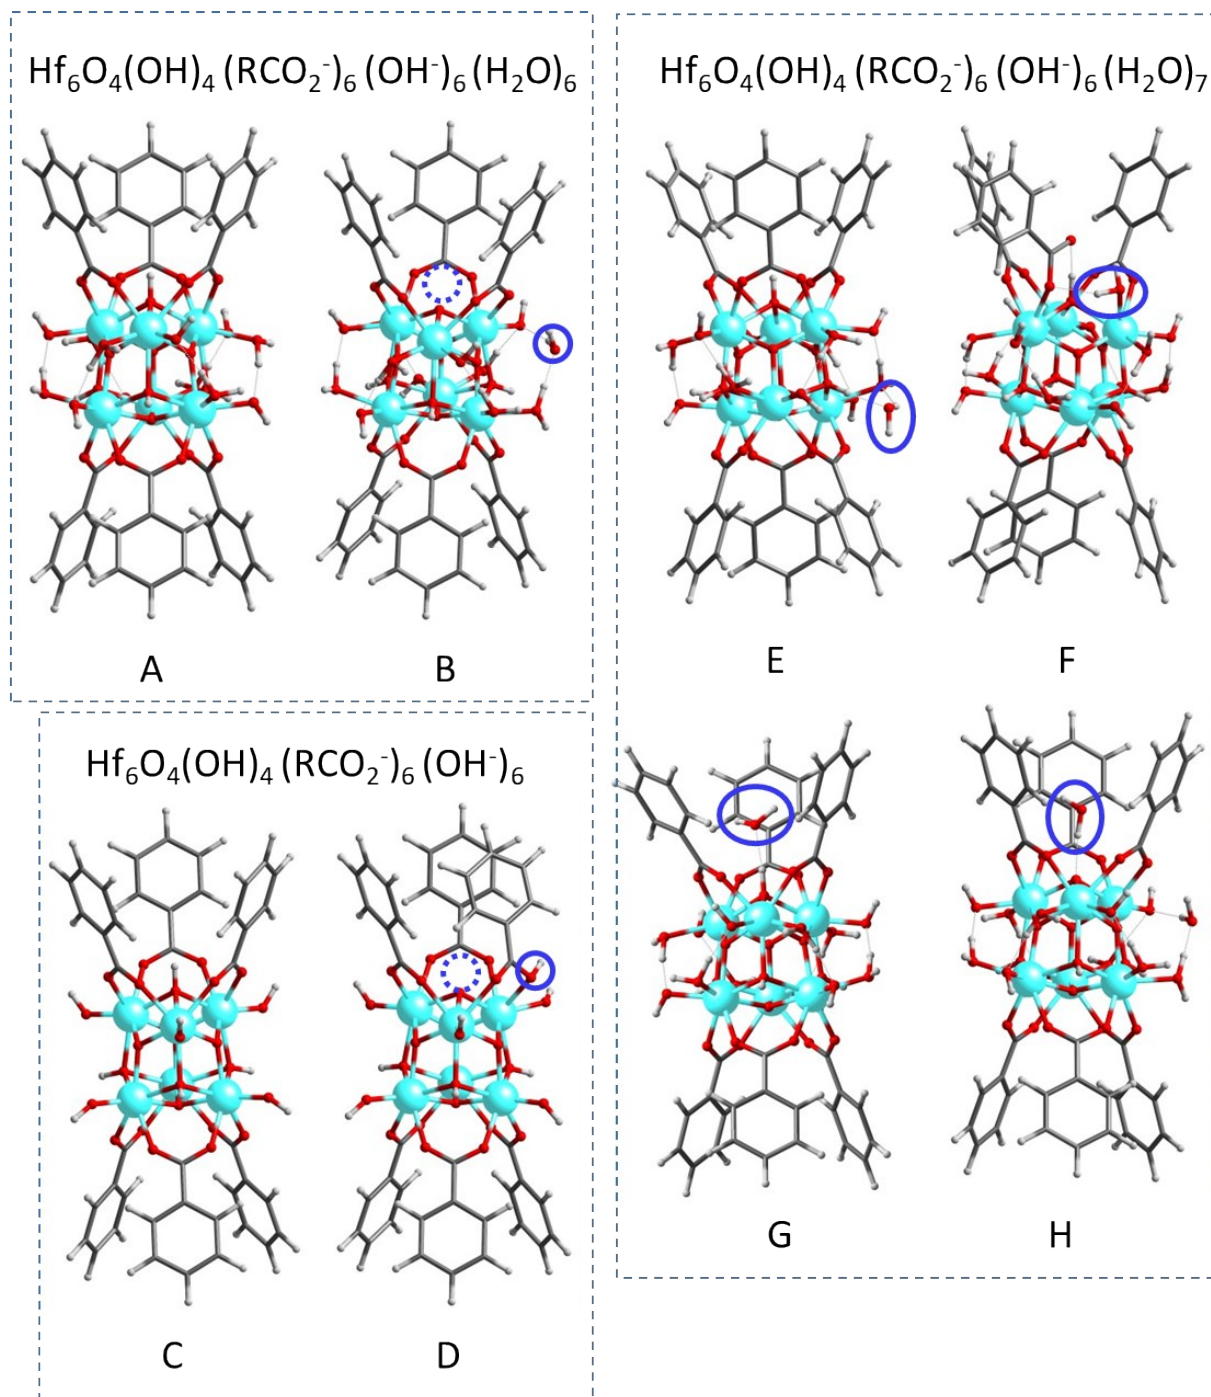

**Figure S2.** N<sub>2</sub> adsorption and desorption isotherms of Hf-MOF-808\_H<sub>2</sub>O (red triangles) and Hf-MOF-808\_DMF (blue circles) materials.

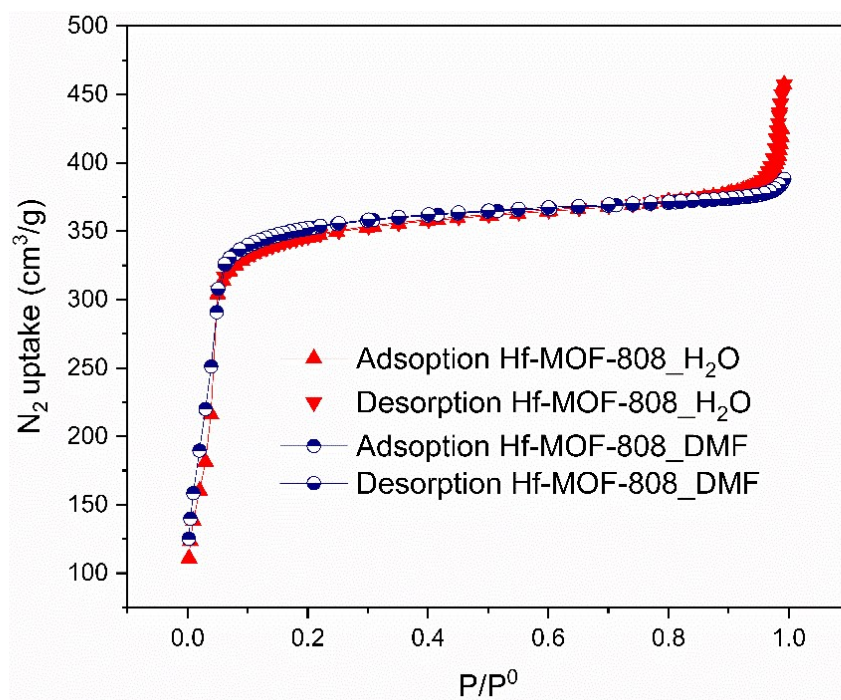

**Figure S3.** FTIR spectra of Hf-MOF-808\_H<sub>2</sub>O (red line) and Hf-MOF-808\_DMF (blue line) together with the FTIR spectrum of the organic ligand (black line) employed in its preparation.

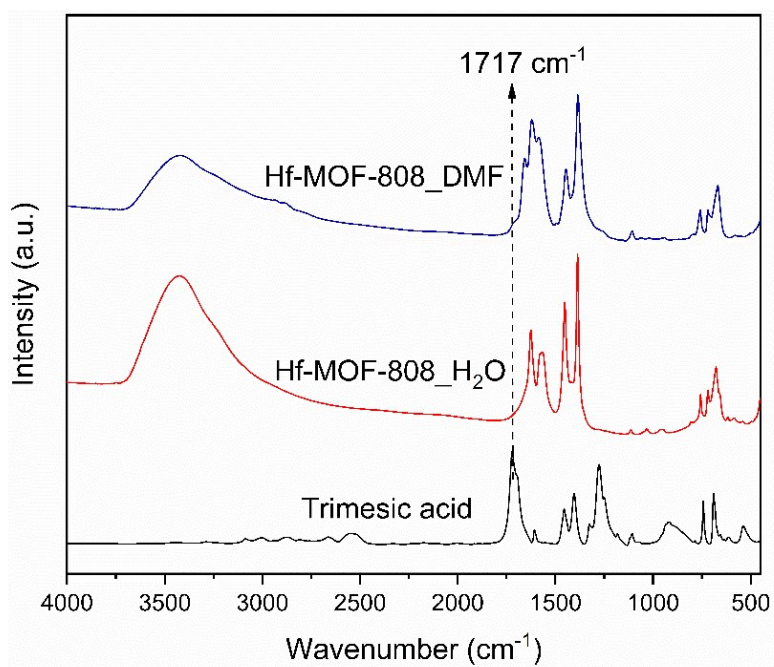

**Figure S4.** Thermogravimetric analysis of Hf-MOF-808\_H<sub>2</sub>O (red line) and Hf-MOF-808\_DMF (blue line).

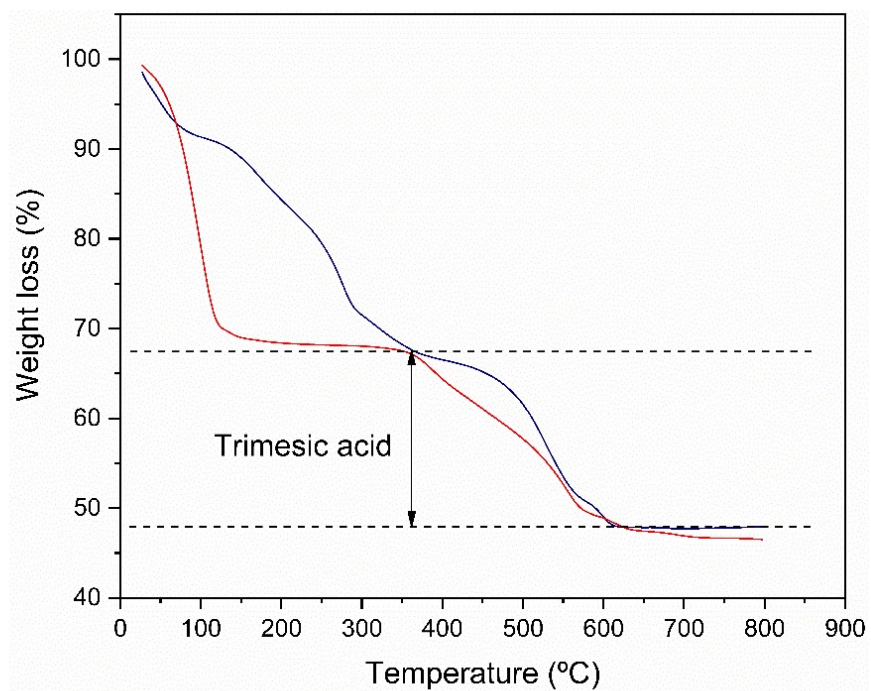

**Figure S5.** Curve fitting for the Hf4f XPS spectra of Hf-MOF-808\_DMF (bottom) and Hf-MOF-808\_H<sub>2</sub>O (top).

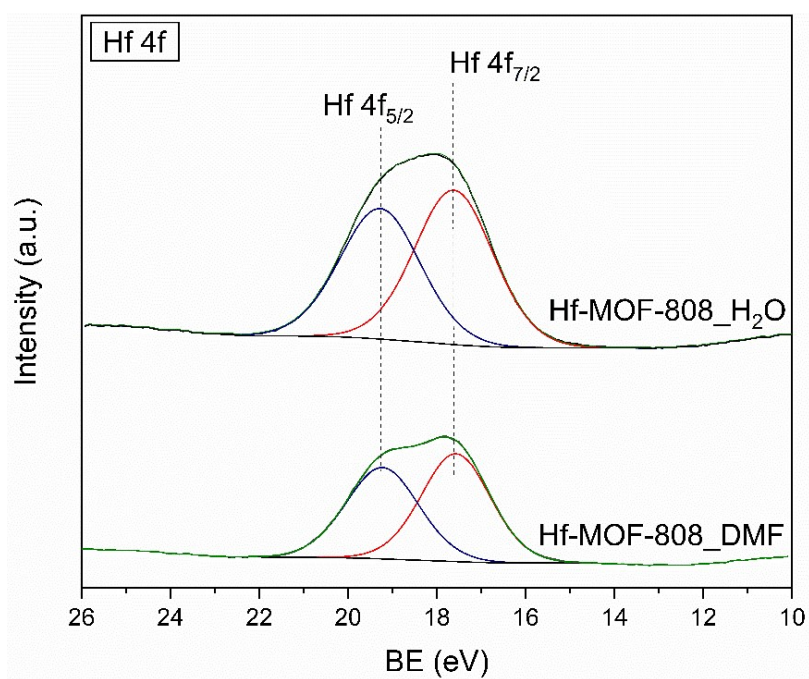

**Figure S6.** Curve-fittings and  $|FT|$  of the  $k^3$ -weighted  $\chi(k)$  functions of Hf-MOF-808\_H<sub>2</sub>O (red) and Hf-MOF-808\_DMF (blue).

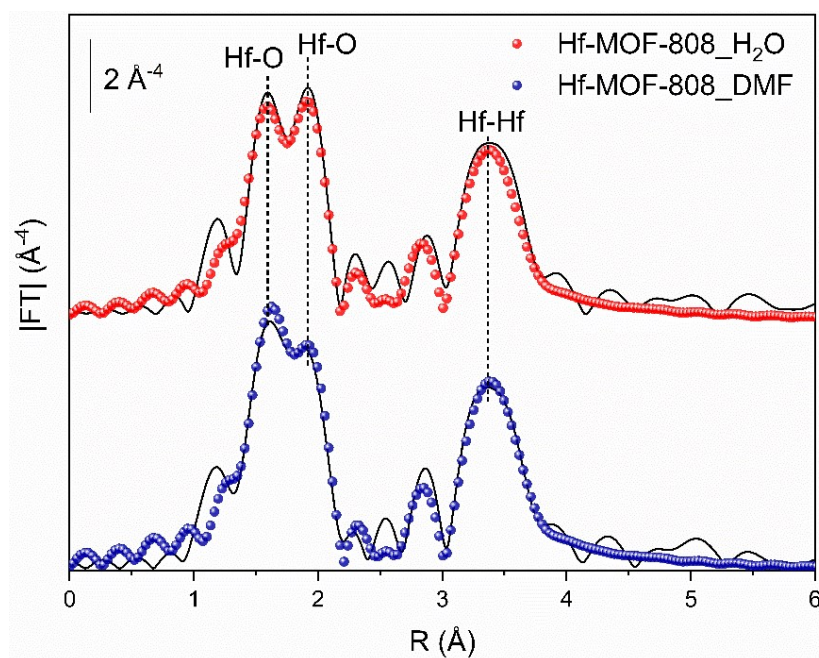

**Figure S7.** Kinetic profiles for  $\alpha$ -pinene oxide conversion employing Hf-MOF-808\_H<sub>2</sub>O (red circles) and Hf-MOF-808\_DMF (blue squares) as catalysts.

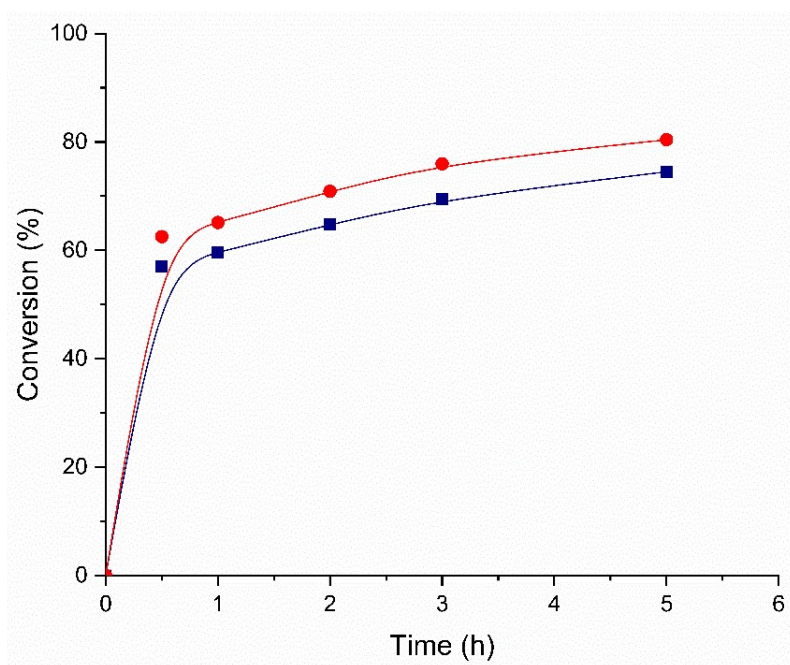



**Figure S8.** Product selectivity for the isomerization of  $\alpha$ -pinene oxide at 75-80% conversion employing Hf-MOF-808\_H<sub>2</sub>O and Hf-MOF-808\_DMF as catalysts. The dotted line indicates the selectivity of 55%.

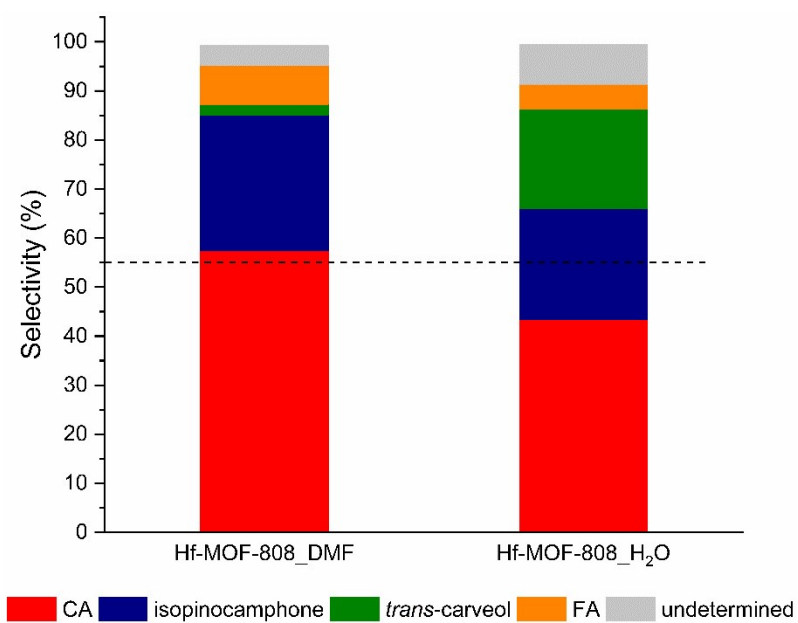

**Figure S9.** A) Hot filtration test of Hf-MOF-808\_H<sub>2</sub>O (red triangles) and Hf-MOF-808\_DMF (blue triangles). B) Recyclability test of Hf-MOF-808\_H<sub>2</sub>O and Hf-MOF-808\_DMF after two consecutive runs for the isomerization of  $\alpha$ -pinene oxide.

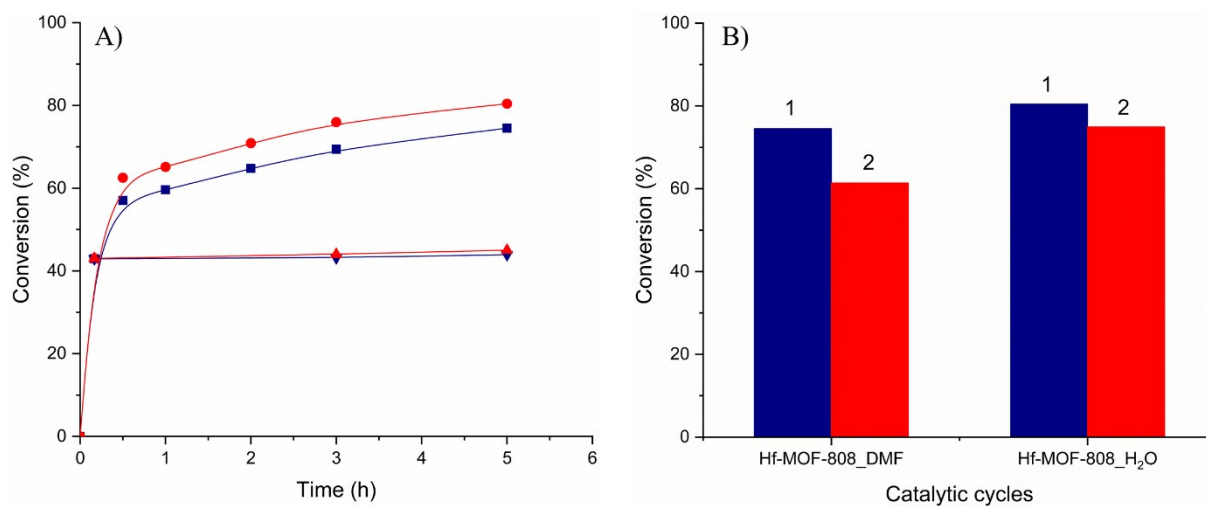

**Scheme S1.**  $\alpha$ -pinene oxide isomerization catalyzed by Hf-MOF-808.

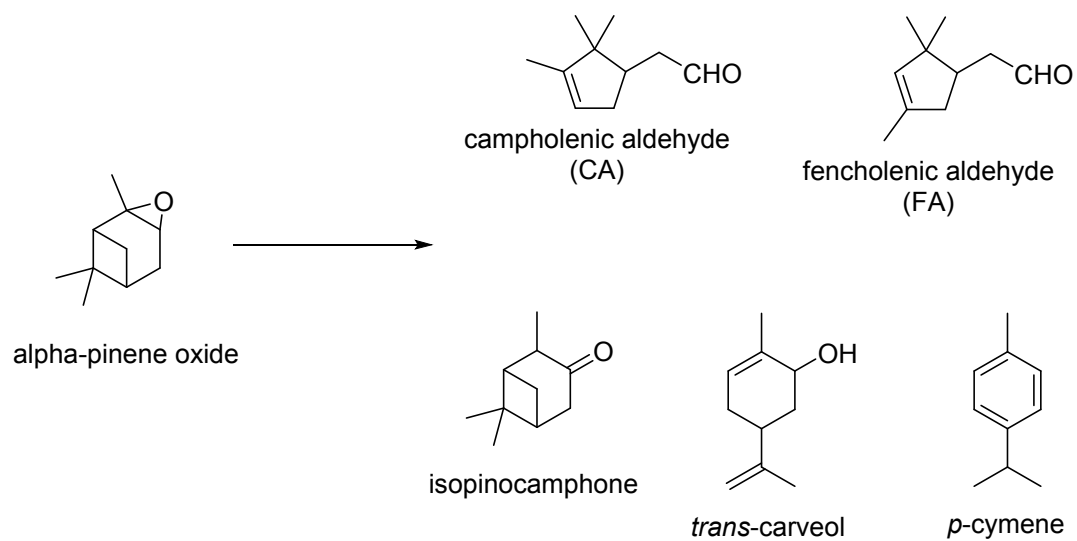

**Table S1.** Relative amount of Brønsted and Lewis acid sites obtained from  $^{31}\text{P}$  MAS NMR spectra when TMPO was adsorbed onto Hf-MOF-808\_H<sub>2</sub>O (P/Hf molar ratio=0.18) and Hf-MOF-808\_DMF (P/Hf molar ratio=0.21). Integrated  $^{31}\text{P}$  peak area normalized at X ppm are calculated as: (mol P/g-cat)/(mol Hf/g-cat)·<sup>1</sup>(area % at  $\delta$ =X ppm). TOF values were calculated for the epoxide ring-opening (ERO) and Meerwein-Ponndorf-Verley (MPV) reactions.

| Sample                      | Acid site | $\delta$ $^{31}\text{P}$ (ppm) | Integrated $^{31}\text{P}$ area (a.u.) | % area | Integrated area normalized (%) | Ratio Brønsted/Lewis acid sites | Ratio ERO/MPV TOFs |
|-----------------------------|-----------|--------------------------------|----------------------------------------|--------|--------------------------------|---------------------------------|--------------------|
| Hf-MOF-808_H <sub>2</sub> O | Lewis     | 55                             | 14340                                  | 4.17   | 0.75                           | 2.41                            | 4.41               |
|                             |           | 58                             | 86555                                  | 25.16  | 4.53                           |                                 |                    |
|                             | Brønsted  | 62                             | 202195                                 | 58.77  | 10.59                          |                                 |                    |
|                             |           | 68                             | 40958                                  | 11.90  | 2.14                           |                                 |                    |
| Hf-MOF-808_DMF              | Lewis     | 56                             | 203220                                 | 57.90  | 12.16                          | 0.26                            | 0.42               |
|                             |           | 58                             | 74419                                  | 21.20  | 4.45                           |                                 |                    |
|                             | Brønsted  | 62                             | 59814                                  | 17.04  | 3.58                           |                                 |                    |
|                             |           | 69                             | 13512                                  | 3.85   | 0.81                           |                                 |                    |

**Table S2.** Isotropic  $\delta(^{31}\text{P})$  chemical shifts and optimized PO bond lengths calculated for TMPO interacting with different sites in Hf-MOF-808 catalyst models.

| Model | Site                 | $\delta(^{31}\text{P})$ (ppm) | $r(\text{PO})$ ( $\text{\AA}$ ) |
|-------|----------------------|-------------------------------|---------------------------------|
| A     | Hf                   | 52                            | 1.521                           |
| A     | $\mu_3\text{-OH}$    | 48                            | 1.521                           |
| B     | $\text{H}^+$         | 68                            | 1.554                           |
| C     | Hf                   | 52                            | 1.520                           |
| C     | $\mu_3\text{-OH}$    | 48                            | 1.519                           |
| D     | $\text{H}^+$         | 86                            | 1.578                           |
| E     | $\text{H}_2\text{O}$ | 42                            | 1.514                           |
| F     | $\text{H}_2\text{O}$ | 43                            | 1.516                           |

**Table S3.** Summary of optimized parameters by fitting the Hf L<sub>3</sub>-edge EXAFS data.<sup>a</sup>

| Parameter                                         | Hf-MOF-808_H <sub>2</sub> O | Hf-MOF-808_DMF |
|---------------------------------------------------|-----------------------------|----------------|
| N <sub>Hf-O1</sub>                                | 2.4 ± 0.5                   | 3.0 ± 0.4      |
| R <sub>Hf-O1</sub> (Å)                            | 2.060 ± 0.018               | 2.085 ± 0.013  |
| N <sub>Hf-O2</sub>                                | 3.7 ± 0.7                   | 3.9 ± 0.6      |
| R <sub>Hf-O2</sub> (Å)                            | 2.225 ± 0.015               | 2.242 ± 0.013  |
| σ <sup>2</sup> <sub>Hf-O</sub> (Å <sup>2</sup> )  | 0.0036 ± 0.0012             |                |
| N <sub>Hf-Hf</sub>                                | 3.4 ± 1.1                   | 3.8 ± 1.2      |
| R <sub>Hf-Hf</sub> (Å)                            | 3.498 ± 0.009               | 3.506 ± 0.005  |
| σ <sup>2</sup> <sub>Hf-Hf</sub> (Å <sup>2</sup> ) | 0.0043 ± 0.0011             |                |
| ΔE <sub>0</sub> (eV)                              | 7.2 ± 0.9                   |                |
| r-factor (%)                                      | 0.049                       | 0.034          |

<sup>a</sup>The fits were performed up to the second coordination shell over FT of the k<sup>3</sup>-weighted χ(k) functions performed in the Δk = 2.0-13.3 Å<sup>-1</sup> and ΔR = 1.1-4.0 Å intervals, resulting into a number of independent parameters of 41. S<sub>0</sub><sup>2</sup> = 1.0.
